# Supplementary material
Source: publisher figshare collection journal article supplement (https://sage.figshare.com/ndownloader/files/17797631)
Supplement: Supplementary file 1 [file 17797631]

Veterinary Pathology: Supplemental Materials.  
 Matias Ferreyra et al. Polioencephalomyelitis in Domestic Swine  
 Associated with Porcine Astrovirus type 3.

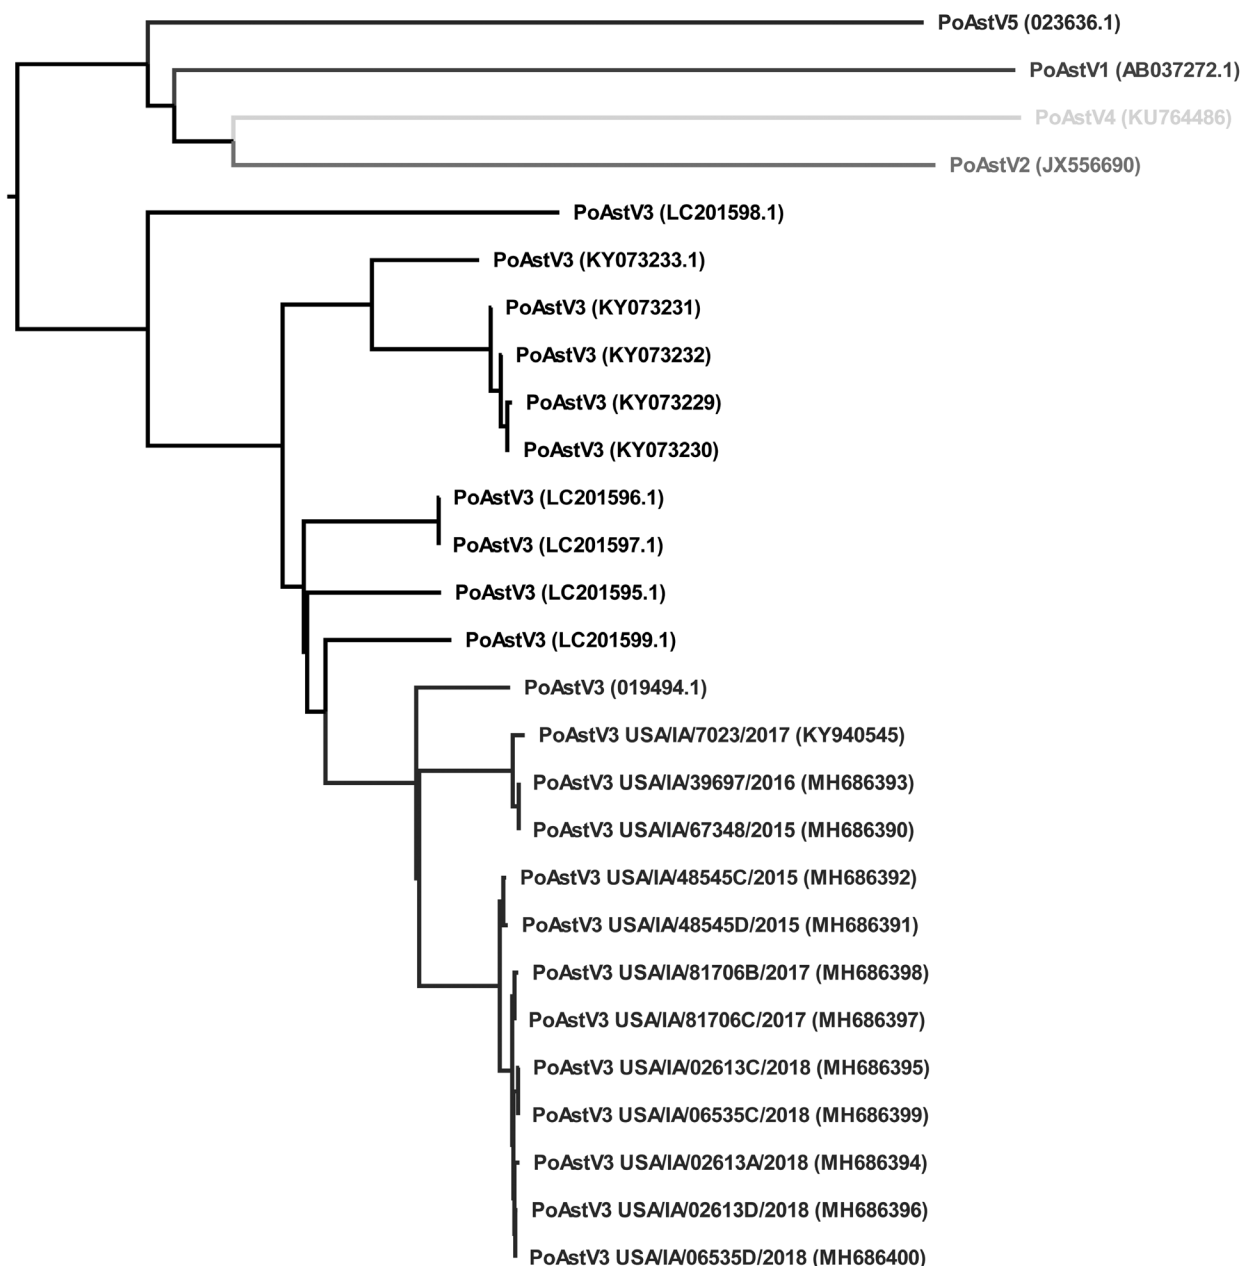

**Supplemental Figure 1**

0.04

Supplemental Figure 1. Phylogenetic tree illustrating the relationship of strains identified in this study with other PoAstV strains. Neighbor-joining tree including 11 strains identified in this study (MH686390 - MH686400) with 16 other PoAstV strains. Sequences were aligned using MUSCLE v3.8.3114 and neighbor-joining trees were built using ClustalW 2.1. Trees were rendered using Fig-Tree v1.427. All sequences were retrieved from GenBank.

Veterinary Pathology: Supplemental Materials.  
 Matias Ferreyra et al. Polioencephalomyelitis in Domestic Swine  
 Associated with Porcine Astrovirus type 3.

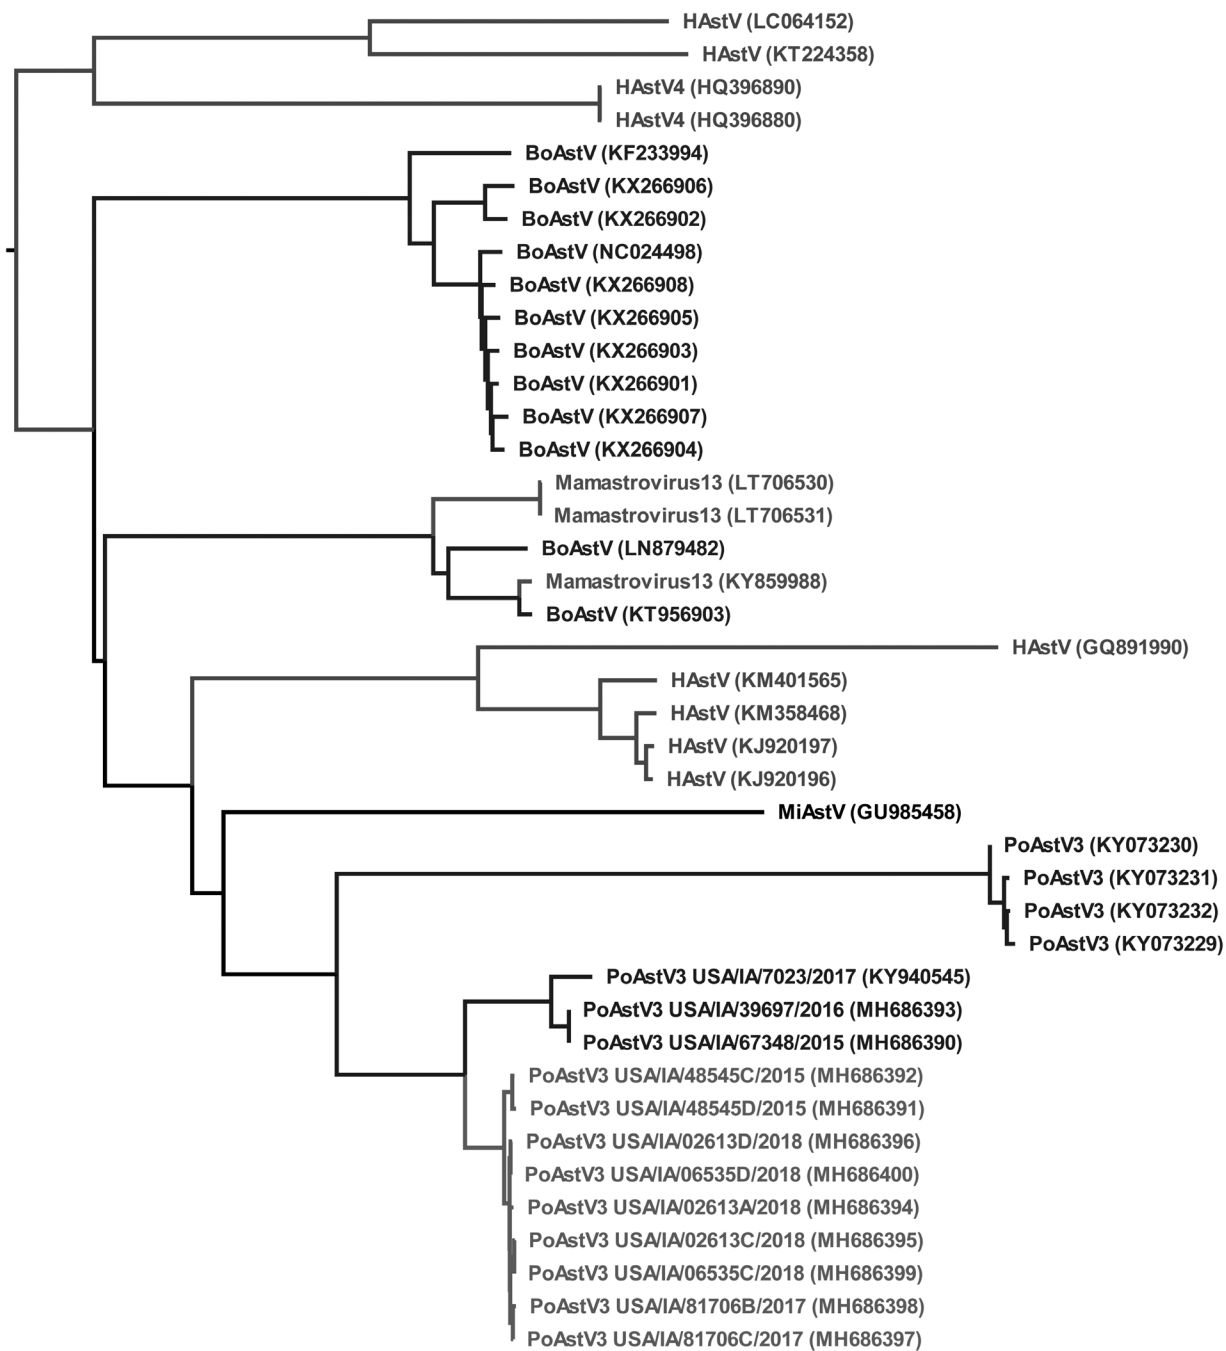

**Supplemental Figure 2**

0.05

Supplemental Figure 2. Phylogenetic tree illustrating the relationship of strains identified in this study with other neurotropic strains. Neighbor-joining tree including 11 strains identified in this study (MH686390 - MH686400) with 30 strains from other species. Sequences were aligned using MUSCLE v3.8.3114 and neighbor-joining trees were built using ClustalW 2.1. Trees were rendered using FigTree v1.427. All sequences were retrieved from GenBank.
